# Supplementary material
Source: Springer Nature journal article supplement (https://www.springermedizin.de/resource/supplementary/13030_2010_88_MOESM3_ESM.pdf/9644744)

### Changes in LF/HF ratio pre, during and post HFYB

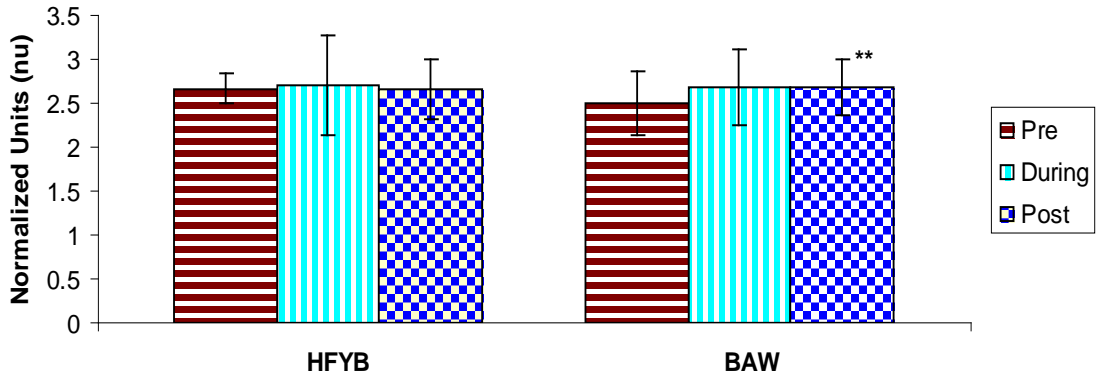

### Changes in mean RR interval pre, during and post HFYB and BAW

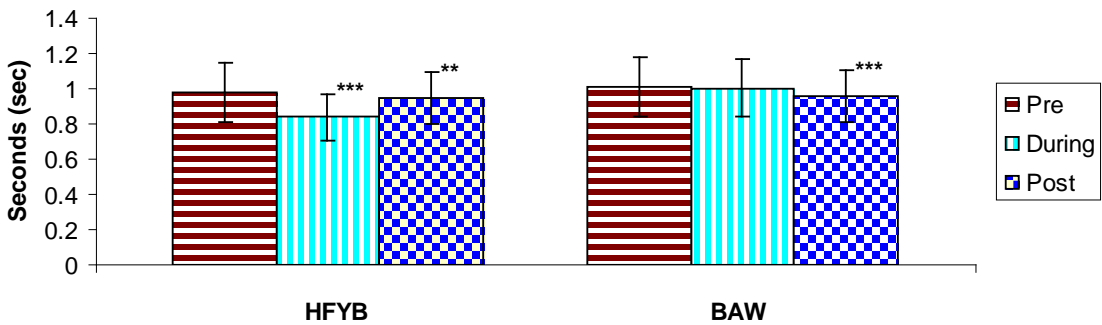

### Changes in NN50 pre, during and post HFYB and BAW

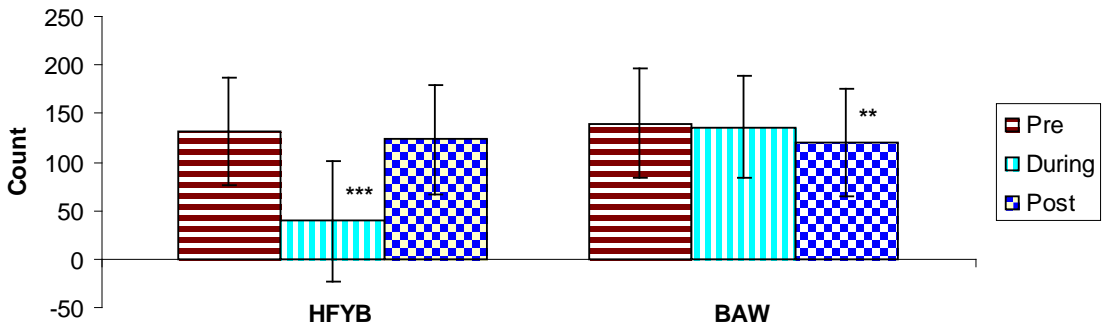

Supplement: MOESM3 [file 9644744]
